# Supplementary material for: Enhanced electrochemical reduction of carbon dioxide to formic acid using a two-layer gas diffusion electrode in a microbial electrolysis cell
Source: Royal Society of Chemistry journal article supplement (doi:10.1039/c4ra14535f), 2015-01-01
Supplement: c4ra14535f1.pdf [file c4ra14535f1.pdf]

1

**- Supporting Information -**

2 **Enhanced Electrochemical Reduction of Carbon Dioxide to**  
3 **Formic Acid Using a Two-layer Gas Diffusion Electrode in**  
4 **Microbial Electrolysis Cell**

5 Qinian Wang, Heng Dong\*, Hongbing Yu\*, Han Yu, Minghui Liu

6 College of Environmental Science and Engineering, Nankai University, No. 94

7 Weijin Road, Nankai District, Tianjin 300071, China

8 \*Corresponding Authors; Phone: (86)22-23502756; Fax: (86)22-23502756; E-mail:

9 dongheng@nankai.edu.cn; hongbingyu1130@sina.com.

10

11

12

13

14

15

16

17

18

19

20

21

22

23 **Table S1** Simulated data of equivalent circuits for the Nyquist plots of impedance.

| Electrode | $E/V$ | $R_S/\Omega$ | $Q_1/$                    | $n_1$ | $R_1/\Omega$ | $Q_2/$                    | $n_2$ | $R_2/\Omega$ |
|-----------|-------|--------------|---------------------------|-------|--------------|---------------------------|-------|--------------|
|           |       |              | $\Omega^{-1} s^n cm^{-2}$ |       |              | $\Omega^{-1} s^n cm^{-2}$ |       |              |
| SE        | -1.2  | 1.431        | $4.154 \times 10^{-5}$    | 1     | 0.900        | $2.392 \times 10^{-3}$    | 0.782 | 20.730       |
|           | -1.3  | 1.421        | $4.160 \times 10^{-5}$    | 1     | 0.919        | $2.534 \times 10^{-3}$    | 0.778 | 9.101        |
| SGDE      | -1.2  | 1.290        | $1.143 \times 10^{-6}$    | 0.922 | 0.994        | $4.641 \times 10^{-3}$    | 0.732 | 16.030       |
|           | -1.3  | 1.307        | $8.046 \times 10^{-5}$    | 0.959 | 0.925        | $5.221 \times 10^{-3}$    | 0.712 | 8.143        |

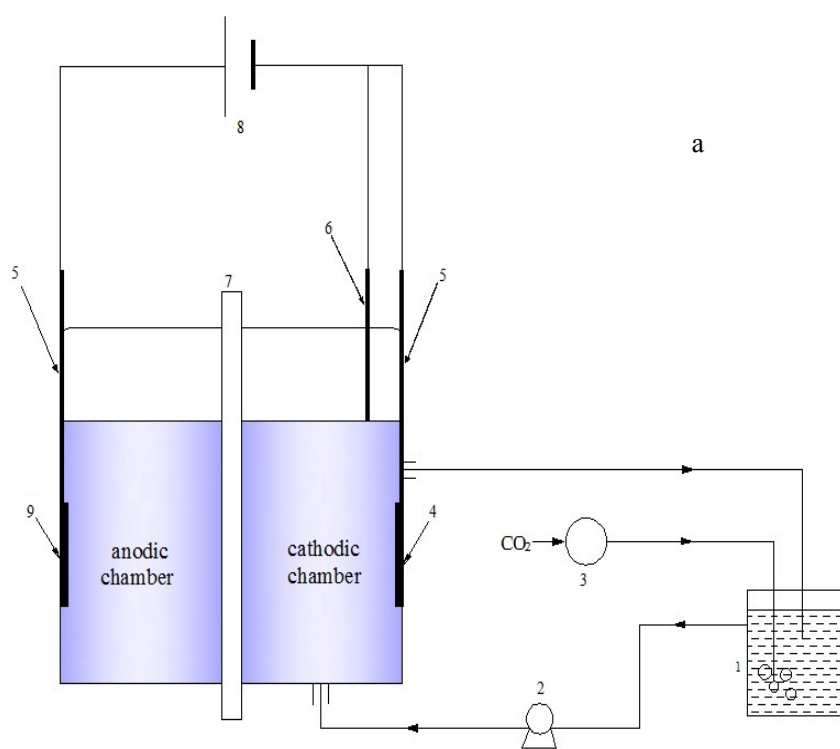

24

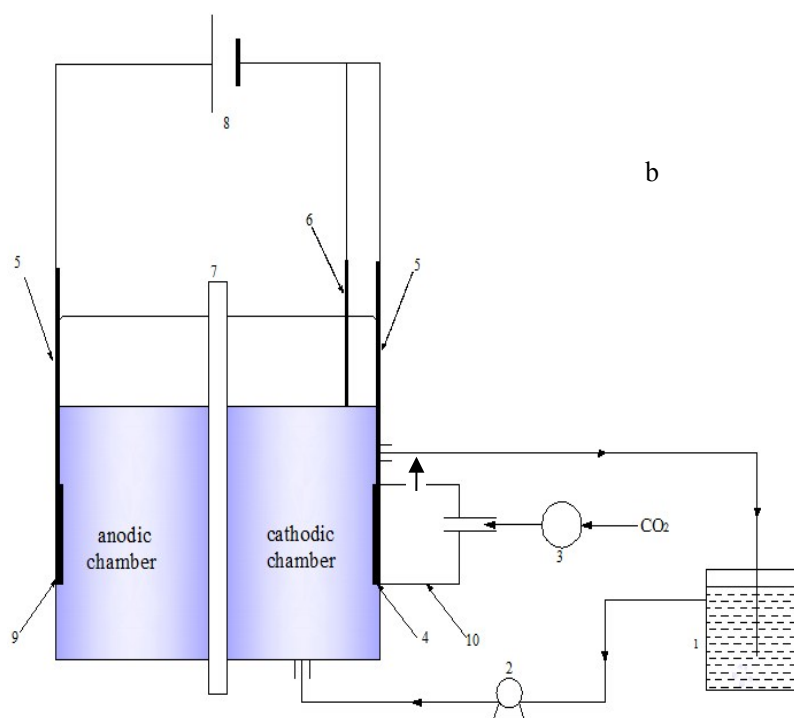

1 Electrolyte, 2 Pump, 3 Flowmeter, 4 Cathode (a: SE, b: SGDE), 5 Titanium wire, 6 Ag/AgCl electrode, 7 PEM, 8 Electrochemical workstation, 9 Anode, 10 Gas chamber.

25

26 **Figure S1** Schematic overview of the MEC systems employed in this work. (a) MEC  
 27 with the SE cathode: the catholyte was saturated with CO<sub>2</sub> before each electrolysis  
 28 run, and CO<sub>2</sub> was continuously sparged into the catholyte during the electrolysis. (b)  
 29 MEC with the SGDE cathode, CO<sub>2</sub> was continuously fed into the gas chamber during  
 30 the electrolysis.

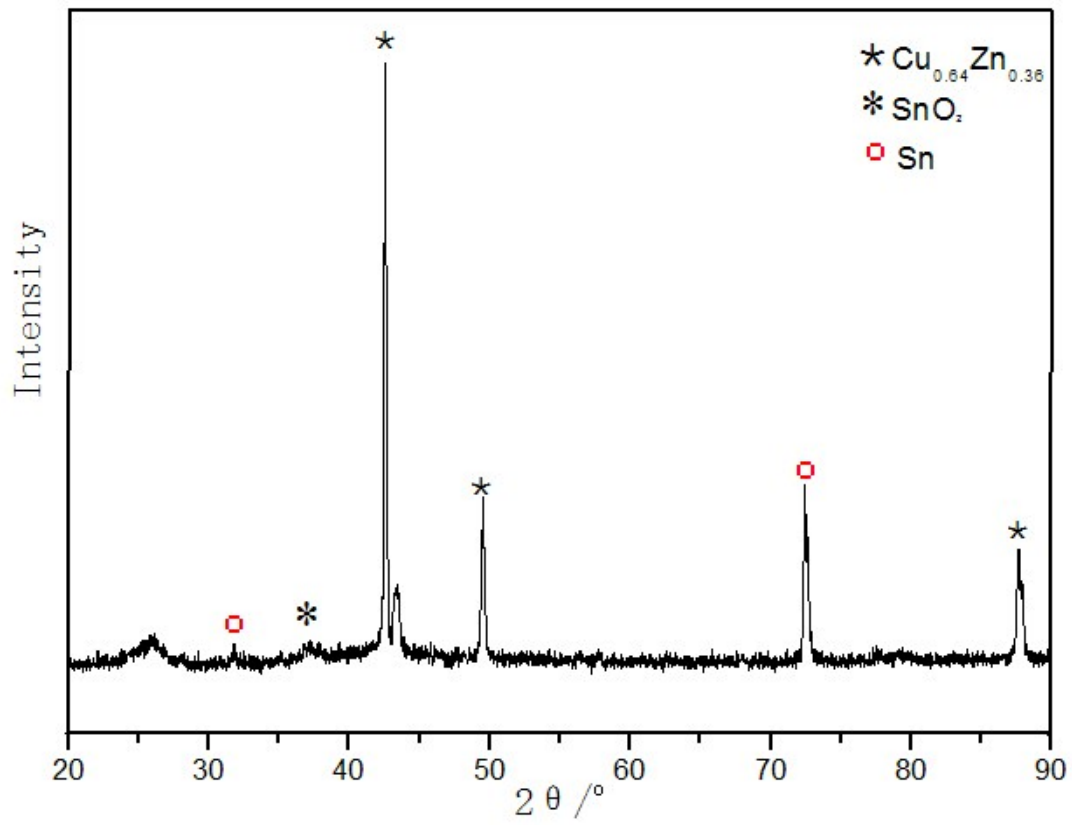

31

32 **Figure S2** XRD pattern of the SGDE.  $\text{Cu}_{0.64}\text{Zn}_{0.36}$  is the major composition of the

33 brass mesh.

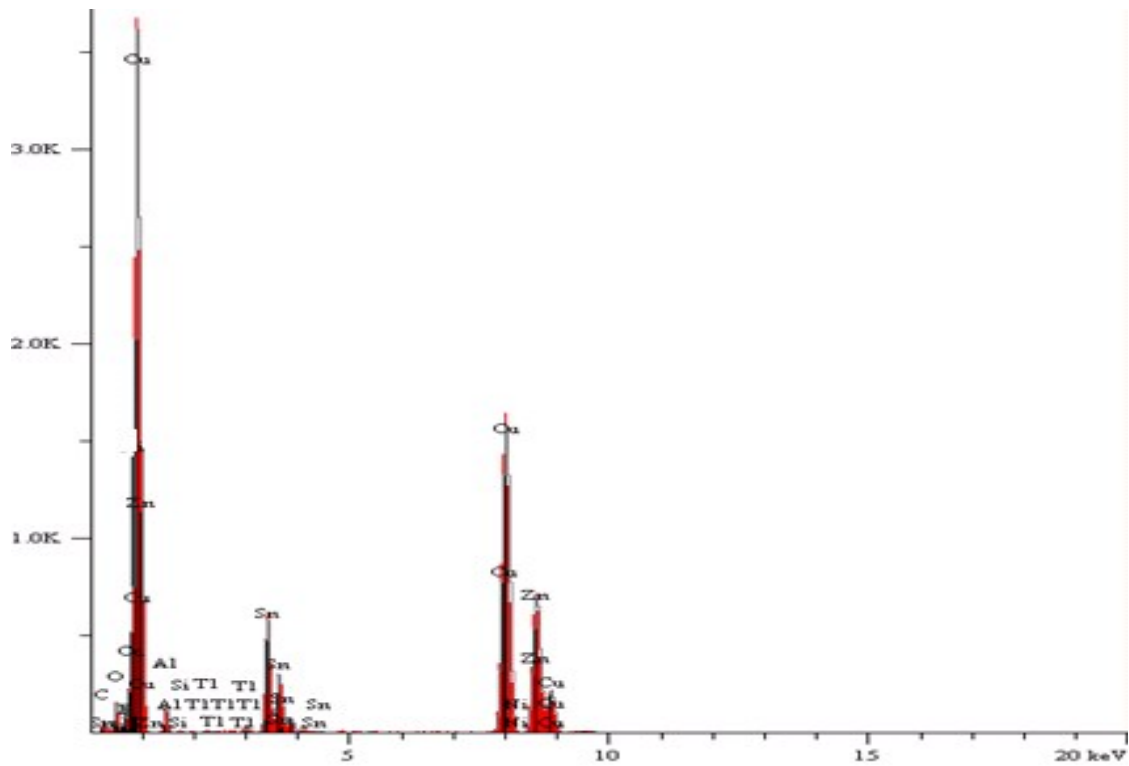

34

35 **Figure S3** EDX spectrum of the Sn-loaded brass mesh in the SGDE. Cu and Zn are  
 36 the baseline elements of the brass mesh. Ni, Ti and Al are the impurities of the brass  
 37 mesh.

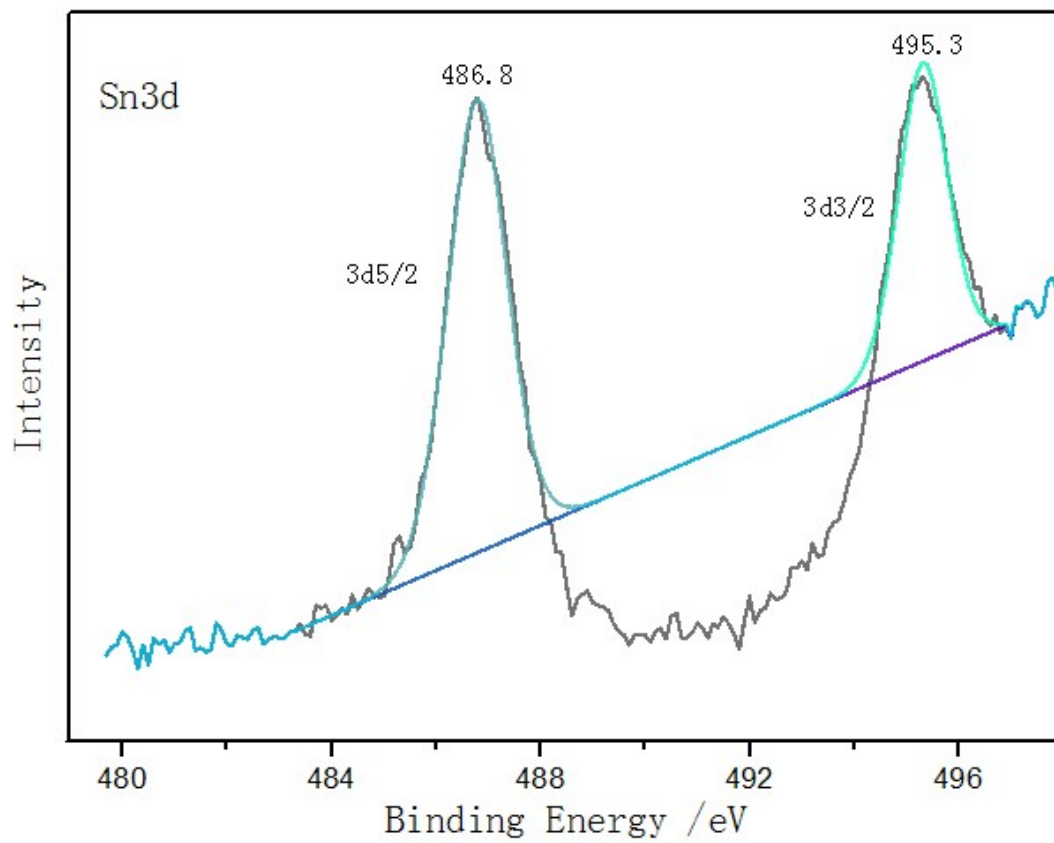

38

39 **Figure S4** XPS spectrum of Sn3d in the Sn-loaded brass mesh of the SGDE.

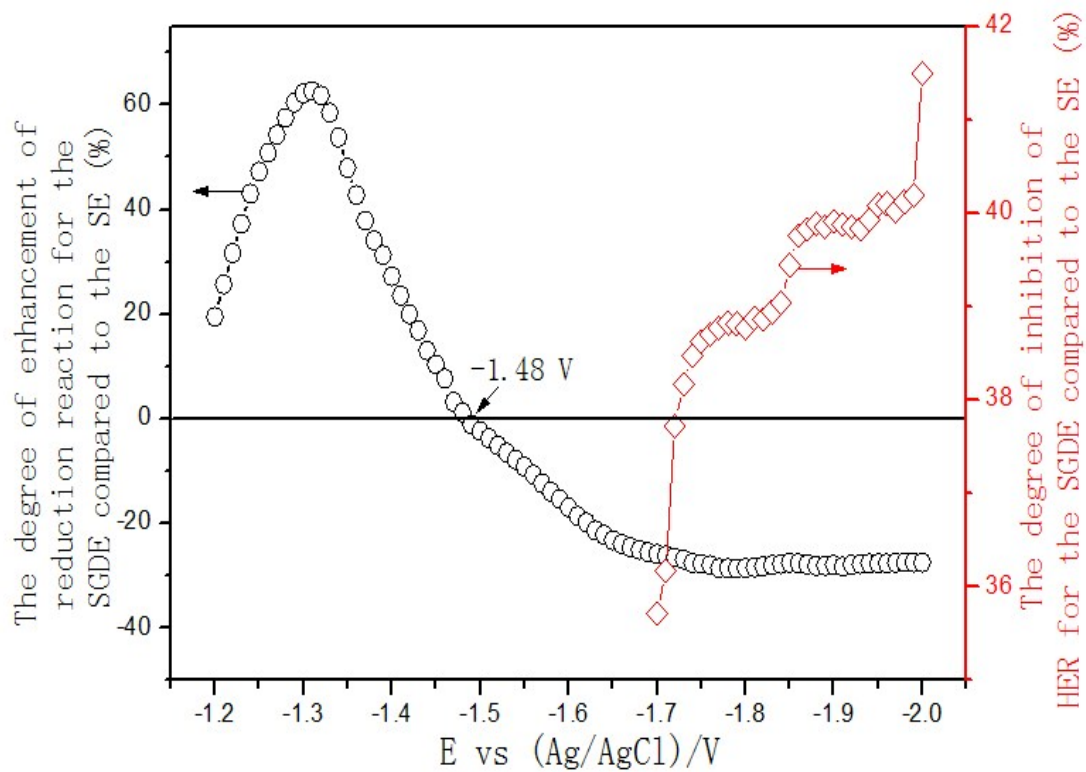

40

41 **Figure S5** The degree of inhibition of HER and of enhancement of reduction  
 42 reactions for the SGDE compared to the SE.

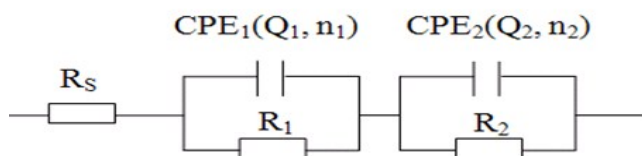

43

44 **Figure S6** Equivalent circuit used for fitting of the impedance.  $R_s$ : solution resistance,  
 45  $R_1$ : interfacial ohmic resistance,  $R_2$ : charge transfer resistance,  $CPE_1$  and  $CPE_2$ :  
 46 constant phase element,  $Q_1$ :  $CPE_1$  value,  $Q_2$ :  $CPE_2$  value,  $n_1$ : coefficient of  $CPE_1$ ,  $n_2$ :  
 47 coefficient of  $CPE_2$ .

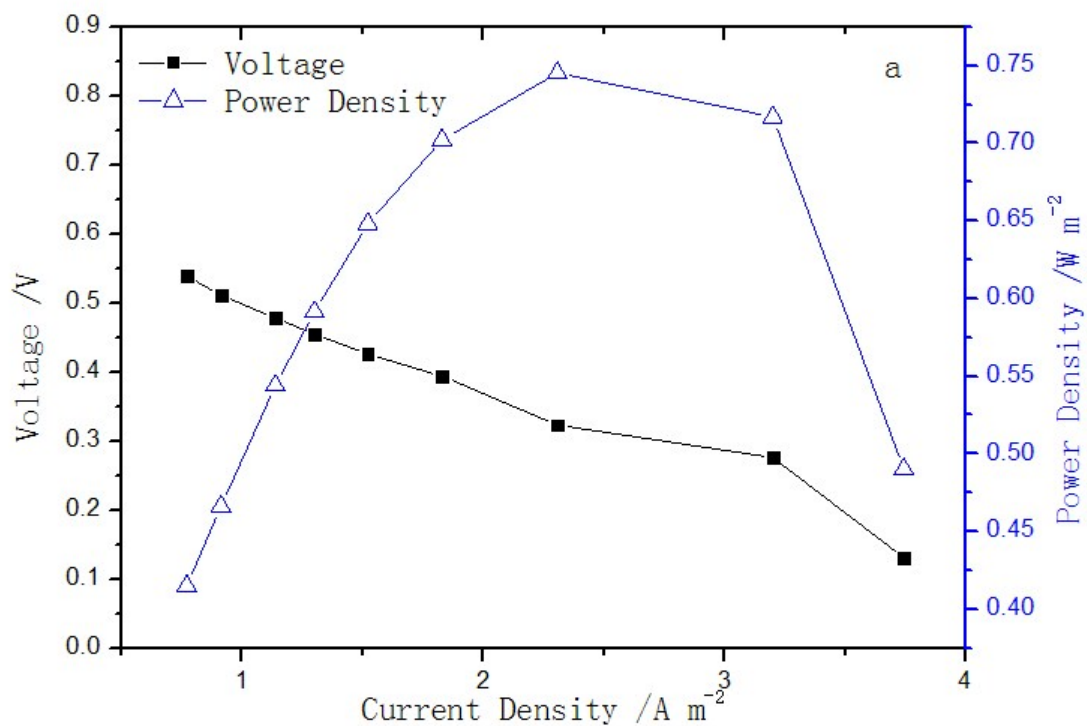

48

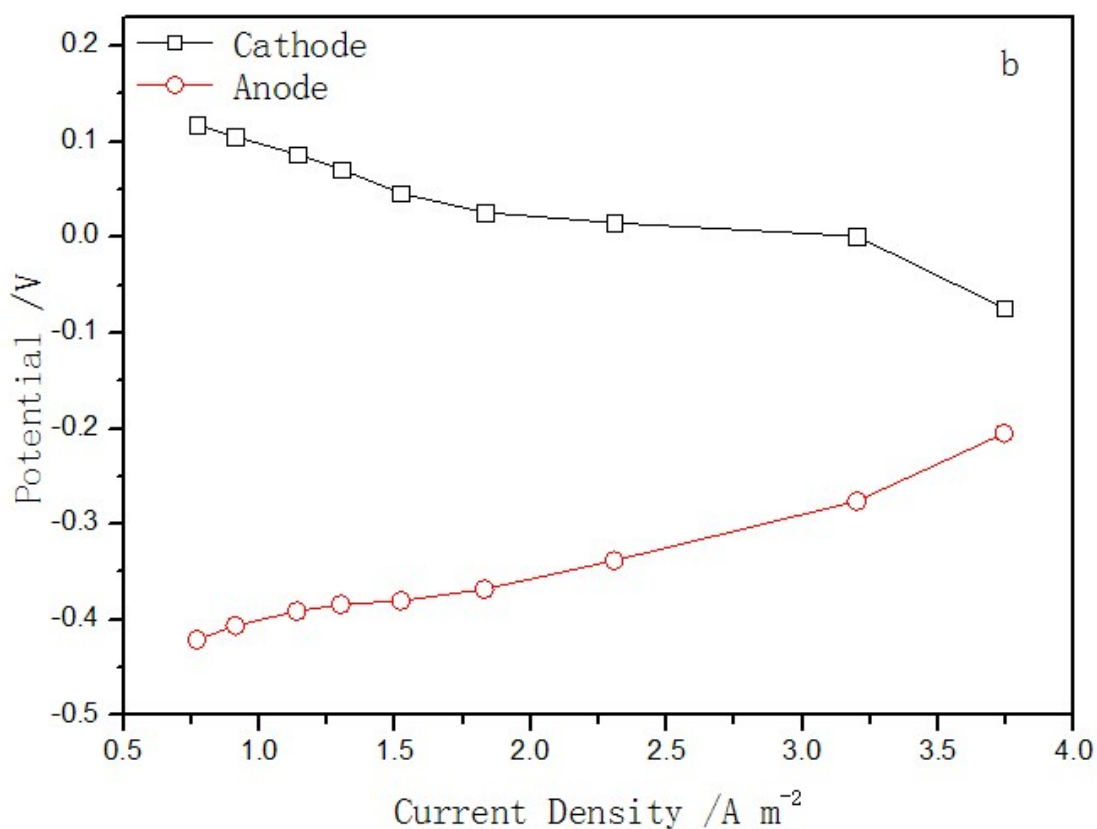

49

50 **Figure S7** Voltage and power density (a) and cathode and anode potential (b) of MFC

51 reactor vs. current density curves.



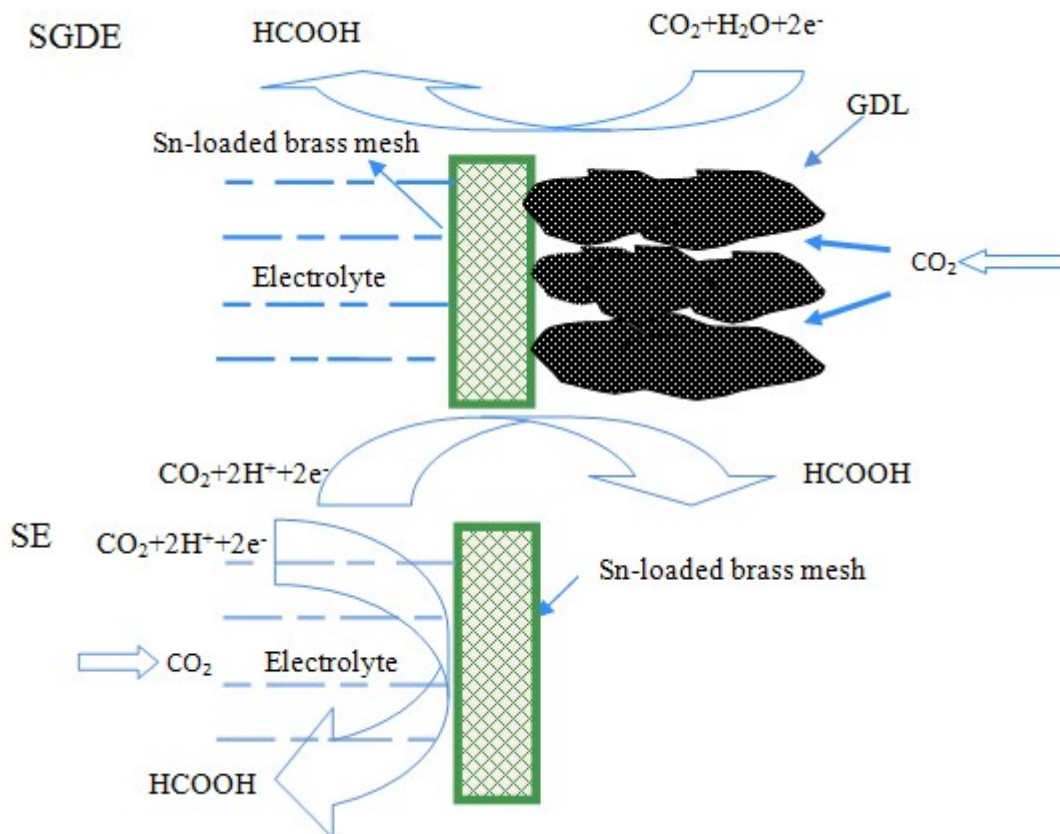

52

53 **Figure S8** Schematic of ERCF for the SGDE (upper) and the SE (lower).

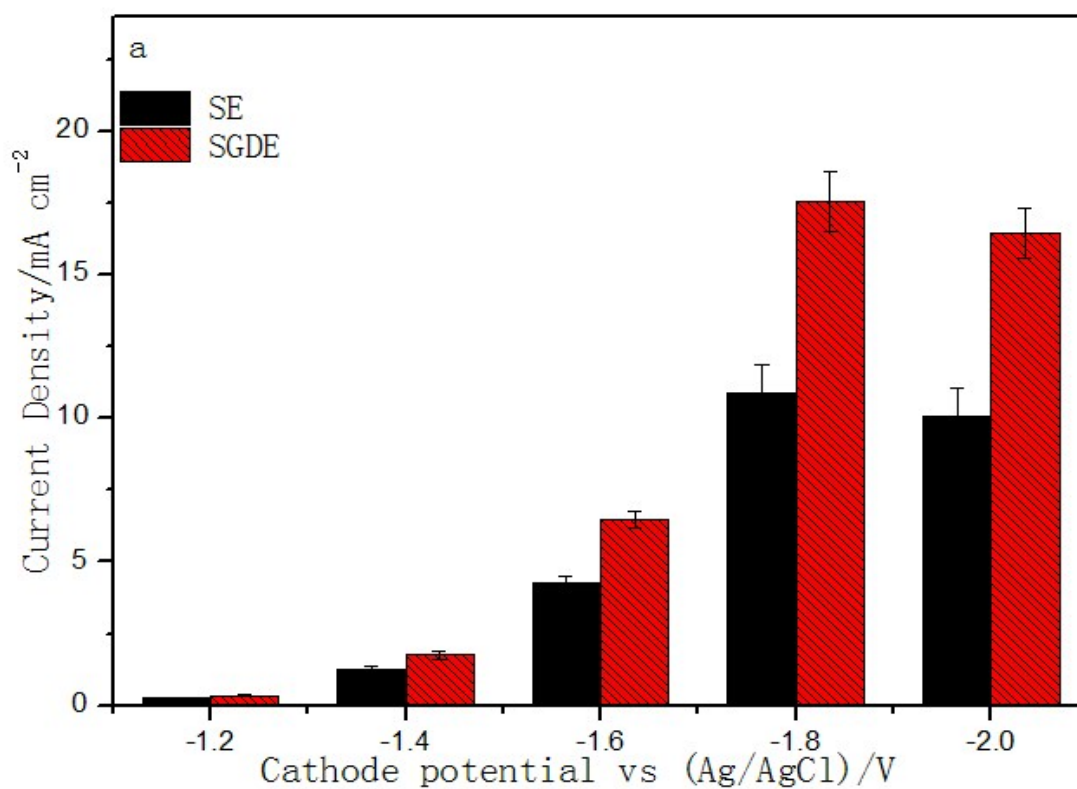

54

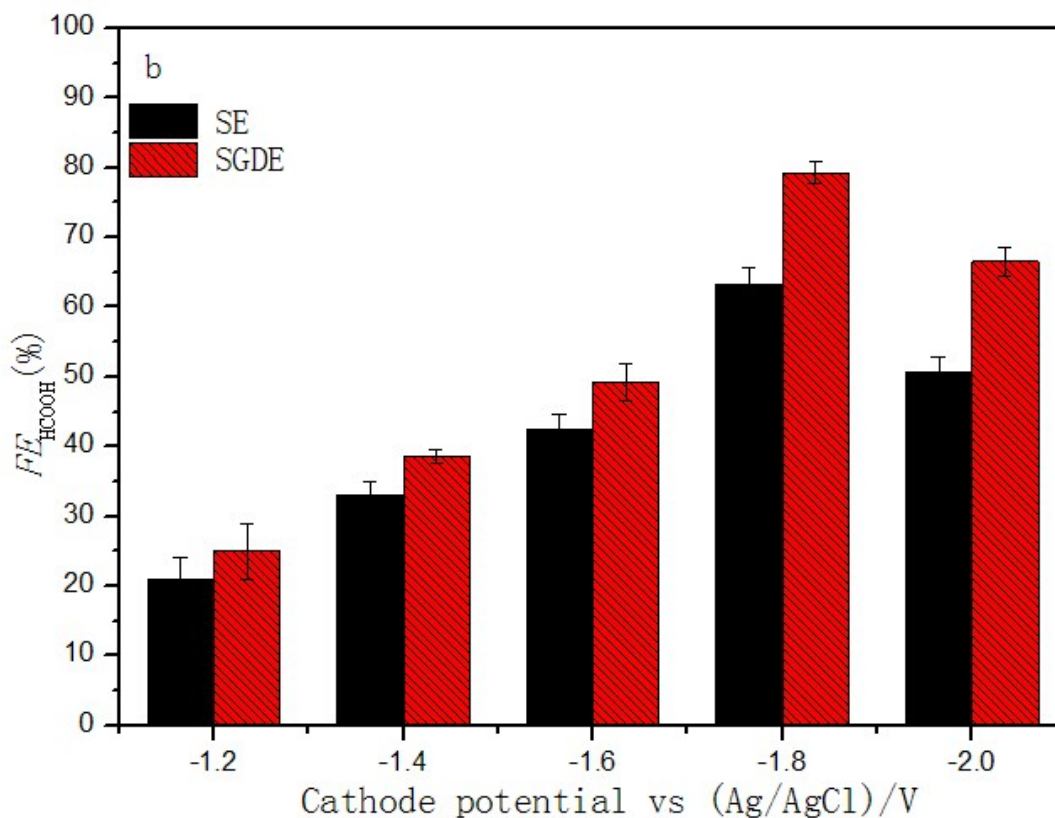

55

56 **Figure S9** ERCF experimental results obtained with the SE and the SGDE in CEC.

57 Current density is expressed as the current used for producing formic acid divided by  
58 the geometric area of the SE and the SGDE.

59 It can be seen that formic acid can be detected from both electrodes at a cathode  
60 potential of -1.2 V. Current density and  $FE_{HCOOH}$  increased when the cathode potential  
61 shifted in negative direction to -1.8 V, but they decreased when the cathode potential  
62 shifted from -1.8 V to -2.0 V. The  $FE_{HCOOH}$  value of  $79.27 \pm 1.52$  % (at -1.8 V) is the  
63 highest one reported in literature when using Sn electrodes under similar conditions <sup>1</sup>.

64 When the cathode potential was more positive than -1.8 V, ERCF became more slack  
65 due to the low standard potential of  $CO_2/CO_2^-$  in aqueous media (-2.33 V vs SCE <sup>2</sup>).

66 Whereas when it was more negative than -1.8 V, side reactions (such as HER)  
67 emerged. This is in accordance with the CV results which showed that HER occurred

68 at cathode potential more negative than ca. -1.7 V.

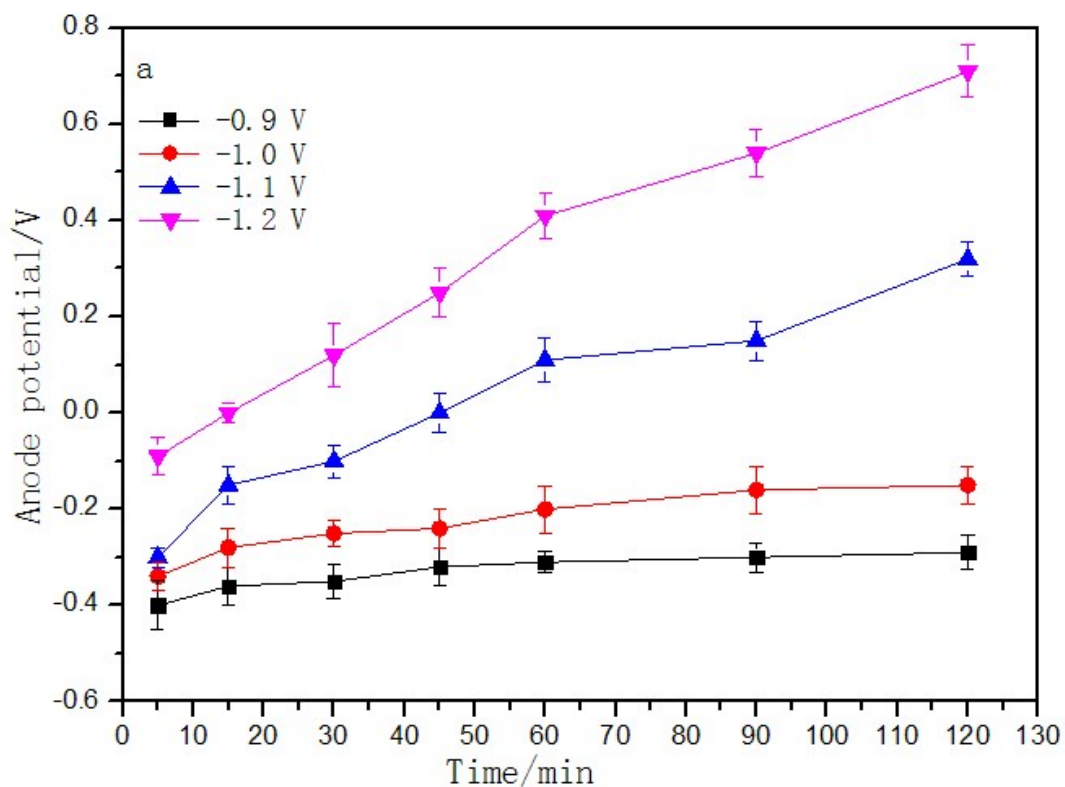

69

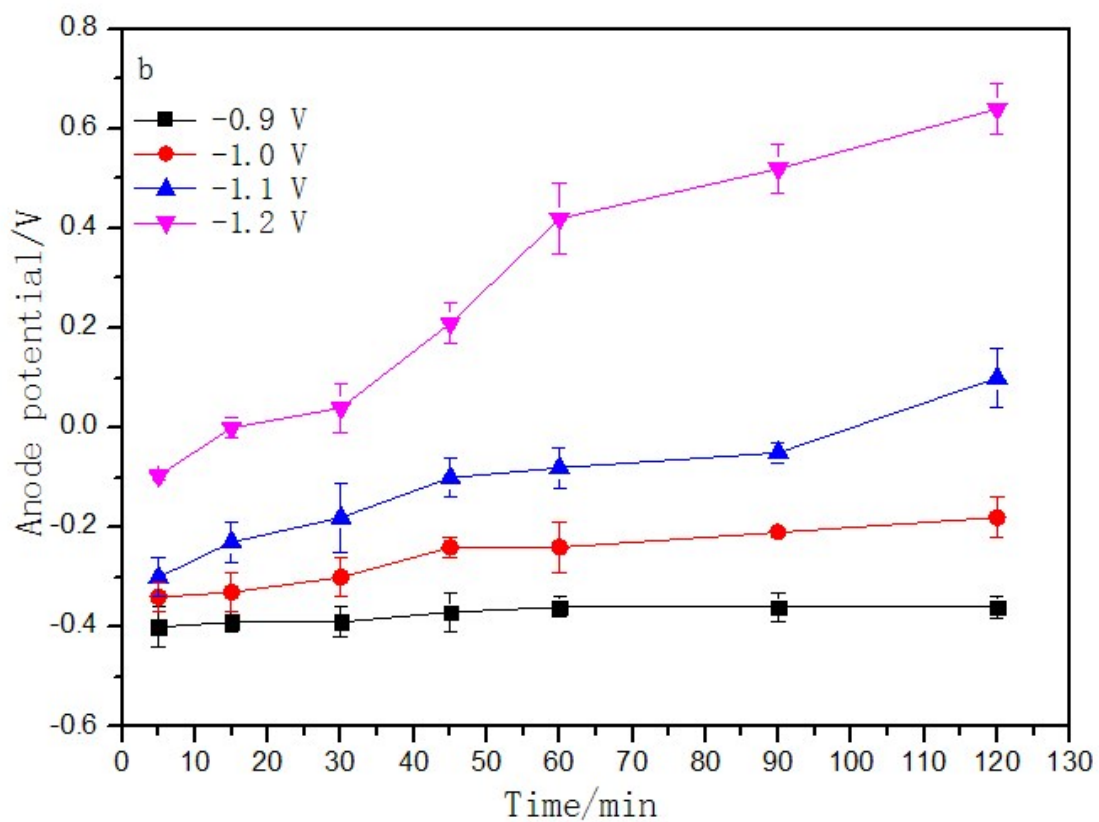

70

71 **Figure S10** Dependence of the anode potential during ERCF run in MEC with the SE  
72 cathode (a) and the SGDE cathode (b) on the applied cathode potential .

73 In a MEC system, with the assistance of the potential generated from microorganism  
74 catalyzed anodic oxidation reaction, lesser power supply is needed to initiate ERCF  
75 than that in a CEC. Meanwhile, the anode potential can influence the electron  
76 liberating capacities of the microorganism <sup>3</sup>. Therefore, the anode potential hold the  
77 key to achieve higher product yield and  $FE_{\text{HCOOH}}$  at the cathode in our MEC systems.

78 In preliminary MEC experiments under constant cathode potential mode, we found  
79 that the anode potential shifted to more positive values during the electrolysis and that  
80 the shifting rate of the anode potential increased when the applied cathode potential  
81 shifted to a more negative value. This may be attributed to the fact that the protons  
82 and electrons released by the biodegradation of organic compounds in the anodic  
83 chamber were unable to meet the needs of the cathode reaction <sup>4</sup>. A high anode  
84 potential will throttle the microorganism catalytic activity. We found that anodic  
85 microorganisms were inactivated at an excessive positive potential (e.g.  $> +1$  V) after  
86 an electrolysis of 2 h in most of the cases. Hence, an electrolytic period of 2 h and an  
87 applied cathode potential from -0.9 V to -1.2 V were adopted in this work for  
88 protecting the microorganisms at the anode. After each ERCF test in MEC, the anode  
89 microorganisms recovered in a short time. ERCF in MEC mode with the SGDE  
90 cathode could be further enhanced by using advanced anode materials with larger  
91 specific surface area, such as graphite brush.

92

### 93 **References**

- 94 1. J. Qiao, Y. Liu, F. Hong and J. Zhang, *Chem Soc Rev*, 2014, 43, 631-675.
- 95 2. V. Lates, A. Falch, A. Jordaan, R. Peach and R. J. Kriek, *Electrochimica Acta*, 2014, 128, 75-  
96 84.
- 97 3. P. Aelterman, S. Freguia, J. Keller, W. Verstraete and K. Rabaey, *Applied Microbiology and*  
98 *Biotechnology*, 2008, 78, 409-418.
- 99 4. Y. Zhan, Q. Wang, G. Yan and S. Guo, *CHEMICAL JOURNAL OF CHINESE*  
100 *UNIVERSITIES-CHINESE EDITION*-, 2008, 29, 559.
- 101
- 102
